## Correction: Mechanosensitive caveolin-1 activation-induced PI3K/Akt/mTOR signaling pathway promotes breast cancer motility, invadopodia formation and metastasis *in vivo*

Hong Yang<sup>1,2,\*</sup>, Liuyuan Guan<sup>1,\*</sup>, Shun Li<sup>1,\*</sup>, Ying Jiang<sup>1</sup>, Niya Xiong<sup>1</sup>, Li Li<sup>1</sup>, Chunhui Wu<sup>1,2</sup>, Hongjuan Zeng<sup>1,2</sup> and Yiyao Liu<sup>1,2</sup>

<sup>1</sup> Department of Biophysics, School of Life Science and Technology, University of Electronic Science and Technology of China, Chengdu 610054, Sichuan, P.R. China

<sup>2</sup> Center for Information in Biomedicine, University of Electronic Science and Technology of China, Chengdu 610054, Sichuan, P.R. China

\* These authors contributed equally to this work

**Published:** August 24, 2018

**Copyright:** Yang et al. This is an open-access article distributed under the terms of the Creative Commons Attribution License 3.0 (CC BY 3.0), which permits unrestricted use, distribution, and reproduction in any medium, provided the original author and source are credited.

**This article has been corrected:** The correct author affiliation is given below:

<sup>1</sup> Department of Biophysics, School of Life Science and Technology, University of Electronic Science and Technology of China, Chengdu 610054, Sichuan, P.R. China

Original article: Oncotarget. 2016; 7:16227-16247. <https://doi.org/10.18632/oncotarget.7583>
